# Supplementary material for: A systematic review and mixed-treatment comparison of dapagliflozin with existing anti-diabetes treatments for those with type 2 diabetes mellitus inadequately controlled by sulfonylurea monotherapy
Source: PubMed Central journal article supplement (PMC4085736; doi:10.1186/1758-5996-6-73), 2014-06-11
Supplement: 1758-5996-6-73-S1.pdf [file 1758-5996-6-73-S1.pdf]

**Table A.1. Database search strategy: Embase <1980 to 2013 week 13>**

| Search term number | Search term                                                                                          |
|--------------------|------------------------------------------------------------------------------------------------------|
| 1                  | sulfonylurea/                                                                                        |
| 2                  | sulfonylurea.mp.                                                                                     |
| 3                  | sulphonylurea.mp.                                                                                    |
| 4                  | glyburide.mp.                                                                                        |
| 5                  | glibenclamide/                                                                                       |
| 6                  | glibenclamide.mp.                                                                                    |
| 7                  | gliclazide/                                                                                          |
| 8                  | gliclazide.mp.                                                                                       |
| 9                  | exp glimepiride/                                                                                     |
| 10                 | glimepiride.mp.                                                                                      |
| 11                 | glipizide/                                                                                           |
| 12                 | glipizide.mp.                                                                                        |
| 13                 | gliquidone/                                                                                          |
| 14                 | gliquidone.mp.                                                                                       |
| 15                 | glyclopamide.mp.                                                                                     |
| 16                 | tolbutamide/                                                                                         |
| 17                 | tolbutamide.mp.                                                                                      |
| 18                 | tolbutamide/                                                                                         |
| 19                 | tolbutamide.mp.                                                                                      |
| 20                 | or/1-19                                                                                              |
| 21                 | exp drug combinations/                                                                               |
| 22                 | (drug therap\$ or drug combination\$).mp.                                                            |
| 23                 | ((combination\$ or oral or multiple) adj (therap\$ or agent\$ or drug\$ or treatment\$)).mp.         |
| 24                 | monotherap\$.mp.                                                                                     |
| 25                 | or/21-24                                                                                             |
| 26                 | 20 and 25                                                                                            |
| 27                 | exp non insulin dependent diabetes mellitus/                                                         |
| 28                 | (MODY or NIDDM or T2DM).mp.                                                                          |
| 29                 | (non insulin\$ depend\$ or noninsulin\$ depend\$ or noninsulin?depend\$ or non insulin?depend\$).mp. |
| 30                 | ((typ\$ 2 or typ\$ II) adj diabet\$).mp.                                                             |
| 31                 | ((keto?resist\$ or non?keto\$) adj diabet\$).mp.                                                     |
| 32                 | ((late or adult\$ or matur\$ or slow or stabl\$) adj diabet\$).mp.                                   |
| 33                 | or/27-32                                                                                             |
| 34                 | randomized controlled trial/                                                                         |
| 35                 | controlled clinical trial/                                                                           |
| 36                 | randomi?ed.ab.                                                                                       |
| 37                 | placebo.ab.                                                                                          |
| 38                 | randomly.ab.                                                                                         |
| 39                 | trial.ab.                                                                                            |
| 40                 | or/34-39                                                                                             |
| 41                 | animal/                                                                                              |
| 42                 | human/                                                                                               |
| 43                 | 41 not (41 and 42)                                                                                   |
| 44                 | 40 not 43                                                                                            |
| 45                 | 26 and 33 and 44                                                                                     |

TOTAL CITATIONS RETRIEVED: 1,570

ab, abstract; mp, multipurpose; sh, subject heading; ti, title
