# Supplementary material for: A systematic review and mixed-treatment comparison of dapagliflozin with existing anti-diabetes treatments for those with type 2 diabetes mellitus inadequately controlled by sulfonylurea monotherapy
Source: PubMed Central journal article supplement (PMC4085736; doi:10.1186/1758-5996-6-73), 2014-06-11
Supplement: 1758-5996-6-73-S2.pdf [file 1758-5996-6-73-S2.pdf]

**Table A.2. Summary of citations excluded after full-text review**

| Citation Details                                                                         | Exclusion reason                                                                                                                                                                                                                                                                                                                                                                      |
|------------------------------------------------------------------------------------------|---------------------------------------------------------------------------------------------------------------------------------------------------------------------------------------------------------------------------------------------------------------------------------------------------------------------------------------------------------------------------------------|
| Blonde, 2006. Obesity & Metabolism 8: 436-447                                            | Child citation with no additional data (linked to Buse, 2004).                                                                                                                                                                                                                                                                                                                        |
| Hardy, 2011. Diabetologia 54: S344-S345.                                                 | Abstract only (pre-2012 cut-off).                                                                                                                                                                                                                                                                                                                                                     |
| Hardy, 2012. Diabetes 61: A252.                                                          | Review /pooled analysis.                                                                                                                                                                                                                                                                                                                                                              |
| Inagaki, 2012. European Association for the Study of Diabetes: Abstract 847              | Not a dual therapy comparison of interest (SU or $\alpha$ -glucosidase inhibitor (A-GI)+metformin v (SU or A-GI)+linagliptin).                                                                                                                                                                                                                                                        |
| Kadowaki, 2011. Journal of Diabetes Investigation 2: 210-217.                            | Not a dual therapy comparison of interest (triple).                                                                                                                                                                                                                                                                                                                                   |
| Kaku, 2010. Diabetes, Obesity & Metabolism 12: 341-347.                                  | SU dose at randomisation (not stable dose for minimum of 4 weeks /not half maximum dose); Liraglutide dose lower than EU dose (0.6 mg, 0.9 mg).                                                                                                                                                                                                                                       |
| Kikuchi, 2010. Diabetes Research and Clinical Practice 89: 216-223.                      | SU dose at randomisation (not stable dose for minimum of 4 weeks /not half maximum dose).                                                                                                                                                                                                                                                                                             |
| Kipnes, 2001. American Journal of Medicine 111: 10-17.                                   | Duration of 16 weeks (less than recommended minimum 18 week follow-up period), SU run-in of 4 weeks, background includes (non-standard) individualised weight management but lack of data on weight measurements pre and during trial (baseline not reported, SE in change not reported), entry criteria of HbA1c of 8%< (very poor control), SEs not reported for primary endpoints. |
| Lester, 2005. International Journal of Clinical Practice 59: 134-142.                    | Pooled post-hoc analysis of four RCTs. Not a dual therapy comparison of interest (met+su v pio + su or su + met v pio + met).                                                                                                                                                                                                                                                         |
| Lu, 2011. Chinese Journal of Internal Medicine 50: 826-830                               | Language non-English full text (Chinese).                                                                                                                                                                                                                                                                                                                                             |
| Marre, 2009. Diabetic Medicine 26: 268-278.                                              | SU dose at randomisation (not stable dose for minimum of 4 weeks). Entry criteria were any oral glucose lowering therapy (including combinations). Switch to SU involved SU titration and maintenance period of only 2-4 weeks pre-randomisation.                                                                                                                                     |
| Nauck, 2009. Postgraduate Medicine 121: 5-15.                                            | Child citation with no additional data (linked to Marre, 2009).                                                                                                                                                                                                                                                                                                                       |
| Pan, 2002. Chung-Hua Nei Ko Tsa Chih Chinese Journal of Internal Medicine 41: 388-392.   | Not a dual therapy comparison of interest (mixed metformin/ SU).                                                                                                                                                                                                                                                                                                                      |
| Parikh, 2012. Diabetologia 55: S305.                                                     | Child citation with no additional data (linked to Strojek, 2011).                                                                                                                                                                                                                                                                                                                     |
| Rajagopalan, 2005. Current Medical Research & Opinion 21: 163-172.                       | Pooled post-hoc analysis of 4 RCTs. Not a dual therapy comparison of interest (met+su v pio + su or su + met v pio + met).                                                                                                                                                                                                                                                            |
| Rajagopalan, 2006. American Journal of Geriatric Pharmacotherapy 4: 123-133.             | Pooled post-hoc analysis of elderly patients from 4 RCTs. Not a dual therapy comparison of interest (met+su v pio + su or su + met v pio + met).                                                                                                                                                                                                                                      |
| Ratner, 2011. 47th European Association for the Study of Diabetes (EASD) Annual Meeting. | Not a dual therapy comparison of interest. Patients were inadequately controlled on sulfonylurea $\pm$ metformin (only 16% of patients were on a SU alone).                                                                                                                                                                                                                           |
| Riddle, 2006. Diabetes/Metabolism                                                        | Child citation with no additional data (linked to Buse, 2004).                                                                                                                                                                                                                                                                                                                        |

| Citation Details                                           | Exclusion reason                                                                                                                                |
|------------------------------------------------------------|-------------------------------------------------------------------------------------------------------------------------------------------------|
| Research Reviews 22: 483-491.                              |                                                                                                                                                 |
| Salsali, 2012. Diabetes 61: A593-A594.                     | Child citation with no additional data (linked to Strojek, 2011).                                                                               |
| Seino, 2010. Diabetologia 53: S329.                        | Abstract only (pre-2012 cut-off).                                                                                                               |
| Seino, 2012. Journal of Diabetes Investigation 3: 517-525. | SU dose at randomisation (any dose allowed/ not half maximum dose).                                                                             |
| Seino, 2012. Journal of Diabetes Investigation 3: 388-395  | SU dose at randomisation (not stable dose for minimum of 4 weeks /not half maximum dose); Liraglutide dose lower than EU dose (0.6 mg, 0.9 mg). |
| Strojek, 2010. Diabetologia 53: S347-S348.                 | Abstract only (pre-2012 cut-off).                                                                                                               |
| Tajima, 2011. Diabetology International 2: 32-44.          | SU dose at randomisation (not half maximum dose). Sitagliptin dose not an EU licensed dose.                                                     |

met, metformin; pio, pioglitazone; RCT, randomised-controlled trial; SE, standard error; SU, sulfonylurea
