# Supplementary material for: A systematic review and mixed-treatment comparison of dapagliflozin with existing anti-diabetes treatments for those with type 2 diabetes mellitus inadequately controlled by sulfonylurea monotherapy
Source: PubMed Central journal article supplement (PMC4085736; doi:10.1186/1758-5996-6-73), 2014-06-11
Supplement: 1758-5996-6-73-S3.pdf [file 1758-5996-6-73-S3.pdf]

**Table A.3. Key baseline characteristics for studies included in qualitative systematic review**

| Author, year        | Treatment             | N <sup>a</sup>   | HbA1c, % [SD] | Mean duration of diabetes, years [SD]                               | Age, years [SD] | Male, n (%) | White/Caucasian (excluding Hispanic), n (%) | Non-White / Caucasian, n (%) | BMI, kg/m <sup>2</sup> [SD] | FPG, mmol/L [SD] {mg/dl [SD]} |
|---------------------|-----------------------|------------------|---------------|---------------------------------------------------------------------|-----------------|-------------|---------------------------------------------|------------------------------|-----------------------------|-------------------------------|
| Buse, 2004[64]      | placebo               | 123              | 8.7 [1.2]     | 5.7 [4.7]                                                           | 55 [11]         | 77 (62.6%)  | 82 (66.7%)                                  | 41 (33.3%)                   | 34 [5]                      | 10.8 [3.2]                    |
|                     | exenatide 5 µg BID    | 125              | 8.5 [1.1]     | 6.3 [5.2]                                                           | 55 [10]         | 74 (59.2%)  | 77 (61.6%)                                  | 48 (38.4%)                   | 33 [6]                      | 10.0 [2.5]                    |
|                     | exenatide 10 µg BID   | 129              | 8.6 [1.2]     | 6.6 [6.6]                                                           | 56 [11]         | 74 (57.4%)  | 77 (59.7%)                                  | 52 (40.3%)                   | 33 [6]                      | 9.9 [2.8]                     |
| Garber, 2008[65]    | placebo               | 144 <sup>b</sup> | 8.5 [1.0]     | 7.8 [5.8]                                                           | 57.9 [10.5]     | 84 (58.3%)  | 97 (67.4%)                                  | 47 (32.6%)                   | 31.0 [5.5]                  | 10.3 [2.9]                    |
|                     | vildagliptin 50 mg QD | 132 <sup>b</sup> | 8.5 [0.9]     | 6.9 [5.2]                                                           | 58.6 [10.6]     | 78 (59.1%)  | 91 (68.9%)                                  | 41 (31.1%)                   | 32.2 [4.9]                  | 10.5 [3.0]                    |
| Hermansen, 2007[66] | placebo               | 106              | 8.43 [0.80]   | 8.0 [6.4]                                                           | 55.2 [10.2]     | 58 (54.7%)  | 59 (55.7%)                                  | 47 (44.3%)                   | 30.7 [6.4]                  | {184.9 [42.3]}                |
|                     | sitagliptin 100 mg QD | 106              | 8.42 [0.79]   | 7.2 [5.0]                                                           | 54.4 [10.3]     | 56 (52.8%)  | 61 (57.5%)                                  | 45 (42.5%)                   | 31.0 [6.7]                  | {182.6 [33.1]}                |
| Lewin, 2012[67]     | placebo               | 84               | 8.6 [0.7]     | = <1 year: 7 (8.5%); 1 - 5 years: 29 (35.4%); >5 years: 46 (56.1%)  | 56.2 [10.2]     | 52 (61.9%)  | 34 (40.5%)                                  | 50 (59.5%)                   | 28.2 [5.1]                  | {174.9 [49.0]}                |
|                     | linagliptin 5 mg QD   | 161              | 8.6 [0.9]     | = <1 year: 11 (7.0%); 1 - 5 years: 55 (34.8%); >5 years: 92 (58.2%) | 57.2 [9.8]      | 77 (47.8%)  | 73 (45.3%)                                  | 88 (54.7%)                   | 28.4 [5.0]                  | {182.0 [51.8]}                |

| Author, year         | Treatment                 | N <sup>a</sup>   | HbA1c, %<br>[SD] | Mean duration<br>of diabetes,<br>years [SD] | Age,<br>years<br>[SD] | Male, n<br>(%) | White/<br>Caucasian<br>(excluding<br>Hispanic), n<br>(%) | Non-White<br>/<br>Caucasian,<br>n (%) | BMI, kg/m <sup>2</sup><br>[SD]                            | FPG,<br>mmol/L [SD]<br>{mg/dl<br>[SD]} |
|----------------------|---------------------------|------------------|------------------|---------------------------------------------|-----------------------|----------------|----------------------------------------------------------|---------------------------------------|-----------------------------------------------------------|----------------------------------------|
| Strojek,<br>2011[34] | placebo                   | 145 <sup>c</sup> | 8.15 [0.74]      | 7.4 [5.7]                                   | 60.3<br>[10.16]       | 71 (49.0%)     | NR                                                       |                                       | BMI >= 25:<br>125<br>(86.2%);<br>BMI >= 30:<br>66 (45.5%) | 9.58 [2.07]                            |
|                      | dapagliflozin<br>10 mg QD | 151 <sup>c</sup> | 8.07 [0.79]      | 7.2 [5.5]                                   | 58.9 [8.32]           | 66 (43.7%)     |                                                          |                                       | BMI >= 25:<br>120<br>(79.5%);<br>BMI >= 30:<br>68 (45.0%) | 9.55 [2.04]                            |

<sup>a</sup>number of patients who had baseline values measured; <sup>b</sup>primary efficacy analysis population=at least one dose of study medication, baseline and at least one post-baseline HbA1c measurement; <sup>c</sup>full analysis set=randomised and at least one dose of study medication, baseline and at least one post-baseline efficacy measurement for one or more efficacy variable. Values are mean [SD] unless otherwise stated. BID, twice daily; BMI, body mass index; FPG, Fasting plasma glucose; QD, once daily; SD, standard deviation
