# Supplementary material for: A systematic review and mixed-treatment comparison of dapagliflozin with existing anti-diabetes treatments for those with type 2 diabetes mellitus inadequately controlled by sulfonylurea monotherapy
Source: PubMed Central journal article supplement (PMC4085736; doi:10.1186/1758-5996-6-73), 2014-06-11
Supplement: 1758-5996-6-73-S4.pdf [file 1758-5996-6-73-S4.pdf]

|                                                          | Buse, 2004 | Garber, 2008 | Hermansen, 2007 | Lewin, 2012 | Strojek, 2011 |
|----------------------------------------------------------|------------|--------------|-----------------|-------------|---------------|
| Selection bias: Random sequence generation               | ?          | +            | +               | +           | +             |
| Selection bias: Allocation concealment                   | ?          | -            | +               | +           | +             |
| Performance bias: Blinding of participants and personnel | +          | +            | +               | +           | +             |
| Detection bias: Blinding of outcome assessment           | +          | +            | +               | +           | +             |
| Attrition bias: Incomplete outcome data                  | -          | +            | +               | +           | +             |
| Reporting bias: Selective reporting                      | +          | +            | +               | +           | +             |
| Other sources of bias                                    | +          | +            | +               | +           | +             |

|                      |   |
|----------------------|---|
| Low risk of bias     | + |
| Unclear risk of bias | ? |
| High risk of bias    | - |
